# Supplementary material for: Food Sources of Energy and Nutrients among Adults in the US: NHANES 2003–2006
Source: Nutrients. 2012 Dec 19;4(12):2097–120. doi: 10.3390/nu4122097 (PMC3546624; doi:10.3390/nu4122097)
Supplement: Supplementary File 1 — Supplemental Tables (PDF, 419 KB) [file nutrients-04-02097-s001.pdf]

## Supplemental Tables

|                                                                                                                      |    |
|----------------------------------------------------------------------------------------------------------------------|----|
| <b>Table S1.</b> Food sources of monounsaturated fatty acids (MUFA) among US adults (from NHANES 2003–2006).         | 2  |
| <b>Table S2.</b> Food sources of polyunsaturated fatty acids (PUFA) among US adults (from NHANES 2003–2006).         | 3  |
| <b>Table S3.</b> Food sources of cholesterol among US adults (from NHANES 2003–2006).                                | 4  |
| <b>Table S4.</b> Food sources of total sugars among US adults (from NHANES 2003–2006).                               | 5  |
| <b>Table S5.</b> Food sources of vitamin A (retinoic acid equivalents; RAE) among US adults (from NHANES 2003–2006). | 6  |
| <b>Table S6.</b> Food sources of vitamin E (alpha-tocopherol; AT) among US adults (from NHANES 2003–2006).           | 7  |
| <b>Table S7.</b> Food sources of vitamin C among US adults (from NHANES 2003–2006).                                  | 8  |
| <b>Table S8.</b> Food sources of thiamin among US adults (from NHANES 2003–2006).                                    | 9  |
| <b>Table S9.</b> Food sources of riboflavin among US adults (from NHANES 2003–2006).                                 | 10 |
| <b>Table S10.</b> Food sources of niacin among US adults (from NHANES 2003–2006).                                    | 11 |
| <b>Table S11.</b> Food sources of vitamin B <sub>6</sub> among US adults (from NHANES 2003–2006).                    | 12 |
| <b>Table S12.</b> Food sources of folate (dietary folate equivalents; DFE) among US adults (from NHANES 2003–2006).  | 13 |
| <b>Table S13.</b> Food sources of vitamin B <sub>12</sub> among US adults (from NHANES 2003–2006).                   | 14 |
| <b>Table S14.</b> Food sources of phosphorus among US adults (from NHANES 2003–2006).                                | 15 |
| <b>Table S15.</b> Food sources of magnesium among US adults (from NHANES 2003–2006).                                 | 16 |
| <b>Table S16.</b> Food sources of iron among US adults (from NHANES 2003–2006).                                      | 17 |
| <b>Table S17.</b> Food sources of zinc among US adults (from NHANES 2003–2006).                                      | 18 |

**Table S1.** Food sources of monounsaturated fatty acids (MUFA) among US adults (from NHANES 2003–2006).

| Food group <sup>a</sup>                   | 19+ years <sup>b</sup> |         |              | 19–50 years <sup>c</sup> |         |              | 51+ years <sup>d</sup> |         |              |
|-------------------------------------------|------------------------|---------|--------------|--------------------------|---------|--------------|------------------------|---------|--------------|
|                                           | MUFA                   |         |              | MUFA                     |         |              | MUFA                   |         |              |
|                                           | (mean = 31.3 g)        |         |              | (mean = 33.7 g)          |         |              | (mean = 27.5 g)        |         |              |
|                                           | Ranking                | % Total | Cumulative % | Ranking                  | % Total | Cumulative % | Ranking                | % Total | Cumulative % |
| Other fats and oils                       | 1                      | 10.5    | 10.5         | 1                        | 10.9    | 10.9         | 1                      | 9.9     | 9.9          |
| Beef                                      | 2                      | 9.2     | 19.7         | 2                        | 9.5     | 20.4         | 3                      | 8.6     | 18.5         |
| Cakes, cookies, quick bread, pastry, pie  | 3                      | 8.9     | 28.6         | 3                        | 8.4     | 28.8         | 1                      | 9.9     | 28.4         |
| Frankfurters, sausages, luncheon meats    | 4                      | 7.5     | 36.1         | 4                        | 7.4     | 36.2         | 6                      | 7.6     | 36.0         |
| Cheese                                    | 5                      | 6.6     | 42.7         | 5                        | 7.3     | 43.5         | 7                      | 5.5     | 41.5         |
| Margarine and butter                      | 6                      | 6.4     | 49.1         | 7                        | 5.4     | 48.9         | 4                      | 8.3     | 49.8         |
| Nuts, seeds (including butters, pastes)   | 7                      | 6.2     | 55.3         | 10                       | 5.1     | 54.0         | 5                      | 8.2     | 58.0         |
| Poultry                                   | 8                      | 5.5     | 60.8         | 6                        | 6.2     | 60.2         | 10                     | 4.3     | 62.3         |
| Salad dressings, mayonnaise               | 9                      | 5.2     | 66.0         | 9                        | 5.2     | 65.4         | 8                      | 5.4     | 67.7         |
| Crackers, popcorn, pretzels, chips        | 10                     | 4.9     | 70.9         | 8                        | 5.3     | 70.7         | 9                      | 4.3     | 72.0         |
| Pork, ham, bacon                          | 11                     | 4.0     | 74.9         | 12                       | 3.9     | 74.6         | 11                     | 4.3     | 76.3         |
| Potatoes (white)                          | 12                     | 3.7     | 78.6         | 11                       | 4.5     | 79.1         | 17                     | 2.3     | 78.6         |
| Biscuits, corn bread, pancakes, tortillas | 13                     | 3.4     | 82.0         | 13                       | 3.7     | 82.8         | 13                     | 2.8     | 81.4         |
| Milk                                      | 14                     | 2.6     | 84.6         | 14                       | 2.7     | 85.5         | 14                     | 2.5     | 83.9         |
| Eggs                                      | 15                     | 2.5     | 87.1         | 15                       | 2.2     | 87.7         | 12                     | 3.0     | 86.9         |
| Yeast breads and rolls                    | 16                     | 2.1     | 89.2         | 17                       | 1.9     | 89.6         | 16                     | 2.3     | 89.2         |
| Candy, sugars and sugary foods            | 17                     | 2.1     | 91.3         | 16                       | 2.2     | 91.8         | 18                     | 1.8     | 91.0         |
| Milk desserts                             | 18                     | 2.0     | 93.3         | 19                       | 1.7     | 93.5         | 15                     | 2.4     | 93.4         |

<sup>a</sup> Food groups ( $n = 1$ ) contributing at least 1% in descending order: Mixtures, mostly grain; <sup>b</sup> Data are Day 1 intakes by adults aged 19+ years ( $n = 9490$ ); <sup>c</sup> Data are Day 1 intakes by adults aged 19–50 years ( $n = 5429$ ); <sup>d</sup> Data are Day 1 intakes by adults aged 51+ years ( $n = 4061$ ).

**Table S2.** Food sources of polyunsaturated fatty acids (PUFA) among US adults (from NHANES 2003–2006).

| Food group <sup>a</sup>                   | 19+ years <sup>b</sup> |         |              | 19–50 years <sup>c</sup> |         |              | 51+ years <sup>d</sup> |         |              |
|-------------------------------------------|------------------------|---------|--------------|--------------------------|---------|--------------|------------------------|---------|--------------|
|                                           | PUFA                   |         |              | PUFA                     |         |              | PUFA                   |         |              |
|                                           | (mean = 17.7 g)        |         |              | (mean = 18.8 g)          |         |              | (mean = 16.0 g)        |         |              |
|                                           | Ranking                | % Total | Cumulative % | Ranking                  | % Total | Cumulative % | Ranking                | % Total | Cumulative % |
| Salad dressings, mayonnaise               | 1                      | 17.8    | 17.8         | 1                        | 17.7    | 17.7         | 1                      | 17.9    | 17.9         |
| Other fats and oils                       | 2                      | 11.7    | 29.5         | 2                        | 12.4    | 30.1         | 2                      | 10.4    | 28.3         |
| Crackers, popcorn, pretzels, chips        | 3                      | 9.6     | 39.1         | 3                        | 10.6    | 40.7         | 6                      | 7.7     | 36.0         |
| Cakes, cookies, quick bread, pastry, pie  | 4                      | 8.9     | 48.0         | 4                        | 8.3     | 49.0         | 3                      | 10.0    | 46.0         |
| Margarine and butter                      | 5                      | 7.4     | 55.4         | 6                        | 6.2     | 55.2         | 4                      | 9.4     | 55.4         |
| Nuts, seeds (including butters, pastes)   | 6                      | 7.1     | 62.5         | 7                        | 6.0     | 61.2         | 5                      | 9.1     | 64.5         |
| Poultry                                   | 7                      | 5.8     | 68.3         | 5                        | 6.6     | 67.8         | 8                      | 4.5     | 69.0         |
| Yeast breads and rolls                    | 8                      | 4.6     | 72.9         | 8                        | 4.4     | 72.2         | 7                      | 5.0     | 74.0         |
| Biscuits, corn bread, pancakes, tortillas | 9                      | 3.6     | 76.5         | 9                        | 3.8     | 76.0         | 9                      | 3.2     | 77.2         |
| Frankfurters, sausages, luncheon meats    | 10                     | 3.2     | 79.7         | 10                       | 3.3     | 79.3         | 10                     | 3.0     | 80.2         |
| Potatoes (white)                          | 11                     | 2.2     | 81.9         | 11                       | 2.6     | 81.9         | 13                     | 1.5     | 81.7         |

<sup>a</sup> Food groups ( $n = 7$ ) contributing at least 1% in descending order: Eggs; Pork, ham, bacon; Cheese; Beef; Mixtures, mostly grain; Candy, sugars and sugary foods; and Fish and shellfish; <sup>b</sup> Data are Day 1 intakes by adults aged 19+ years ( $n = 9490$ ); <sup>c</sup> Data are Day 1 intakes by adults aged 19–50 years ( $n = 5429$ ); <sup>d</sup> Data are Day 1 intakes by adults aged 51+ years ( $n = 4061$ ).

**Table S3.** Food sources of cholesterol among US adults (from NHANES 2003–2006).

| Food group <sup>a</sup>                  | 19+ years <sup>b</sup> |         |              | 19–50 years <sup>c</sup> |         |              | 51+ years <sup>d</sup> |         |              |
|------------------------------------------|------------------------|---------|--------------|--------------------------|---------|--------------|------------------------|---------|--------------|
|                                          | Cholesterol            |         |              | Cholesterol              |         |              | Cholesterol            |         |              |
|                                          | (mean = 291 mg)        |         |              | (mean = 304 mg)          |         |              | (mean = 272 mg)        |         |              |
|                                          | Ranking                | % Total | Cumulative % | Ranking                  | % Total | Cumulative % | Ranking                | % Total | Cumulative % |
| Eggs                                     | 1                      | 29.7    | 29.7         | 1                        | 27.1    | 27.1         | 1                      | 34.3    | 34.3         |
| Poultry                                  | 2                      | 13.1    | 41.0         | 2                        | 14.3    | 41.4         | 3                      | 11.1    | 45.4         |
| Beef                                     | 3                      | 12.7    | 53.7         | 3                        | 13.5    | 54.9         | 2                      | 11.3    | 56.7         |
| Cheese                                   | 4                      | 7.9     | 61.6         | 4                        | 8.9     | 63.8         | 4                      | 6.2     | 62.9         |
| Fish and shellfish                       | 5                      | 5.3     | 66.9         | 6                        | 5.1     | 68.9         | 5                      | 5.7     | 68.6         |
| Frankfurters, sausages, luncheon meats   | 6                      | 5.3     | 72.2         | 5                        | 5.5     | 74.4         | 7                      | 4.9     | 73.5         |
| Pork, ham, bacon                         | 7                      | 5.0     | 77.2         | 7                        | 5.0     | 79.4         | 6                      | 5.0     | 78.5         |
| Milk                                     | 8                      | 4.1     | 81.3         | 8                        | 4.2     | 83.6         | 9                      | 3.9     | 82.4         |
| Cakes, cookies, quick bread, pastry, pie | 9                      | 3.9     | 85.2         | 9                        | 3.7     | 87.3         | 8                      | 4.2     | 86.6         |
| Milk desserts                            | 10                     | 2.8     | 88.0         | 10                       | 2.6     | 89.9         | 10                     | 3.3     | 89.9         |

<sup>a</sup> Food groups ( $n = 4$ ) contributing at least 1% in descending order: Other fats and oils; Margarine and butter; Biscuits, corn bread, pancakes, tortillas; and Mixtures, mostly grain; <sup>b</sup> Data are Day 1 intakes by adults aged 19+ years ( $n = 9490$ ); <sup>c</sup> Data are Day 1 intakes by adults aged 19–50 years ( $n = 5429$ ); <sup>d</sup> Data are Day 1 intakes by adults aged 51+ years ( $n = 4061$ ).

**Table S4.** Food sources of total sugars among US adults (from NHANES 2003–2006).

| Food group <sup>a</sup>                  | 19+ years <sup>b</sup> |         |              | 19–50 years <sup>c</sup> |         |              | 51+ years <sup>d</sup> |         |              |
|------------------------------------------|------------------------|---------|--------------|--------------------------|---------|--------------|------------------------|---------|--------------|
|                                          | Total Sugars           |         |              | Total Sugars             |         |              | Total Sugars           |         |              |
|                                          | (mean = 291 mg)        |         |              | (mean = 304 mg)          |         |              | (mean = 272 mg)        |         |              |
|                                          | Ranking                | % Total | Cumulative % | Ranking                  | % Total | Cumulative % | Ranking                | % Total | Cumulative % |
| Soft drinks, soda (includes diet)        | 1                      | 22.7    | 22.7         | 1                        | 27.4    | 27.4         | 2                      | 13.0    | 13.0         |
| Candy, sugars and sugary foods           | 2                      | 13.6    | 36.3         | 2                        | 13.6    | 41.0         | 1                      | 13.6    | 26.6         |
| Cakes, cookies, quick bread, pastry, pie | 3                      | 11.0    | 47.3         | 3                        | 10.0    | 51.0         | 3                      | 12.9    | 39.5         |
| Fruit                                    | 4                      | 7.4     | 54.7         | 7                        | 5.3     | 56.3         | 4                      | 11.8    | 51.3         |
| Milk                                     | 5                      | 7.3     | 62.0         | 5                        | 6.8     | 63.1         | 5                      | 8.4     | 59.7         |
| Fruit drinks and ades                    | 6                      | 7.0     | 69.0         | 4                        | 8.1     | 71.2         | 8                      | 4.7     | 64.4         |
| Fruit juice                              | 7                      | 6.7     | 75.7         | 6                        | 6.4     | 77.6         | 6                      | 7.2     | 71.6         |
| Milk desserts                            | 8                      | 4.3     | 80.0         | 8                        | 3.6     | 81.2         | 7                      | 5.8     | 77.4         |
| Yeast breads and rolls                   | 9                      | 2.3     | 82.3         | 10                       | 2.0     | 83.2         | 9                      | 2.8     | 80.2         |
| Ready-to-eat cereal                      | 10                     | 2.2     | 84.5         | 9                        | 2.2     | 85.4         | 10                     | 2.3     | 82.5         |

<sup>a</sup> Food groups ( $n = 4$ ) contributing at least 1% in descending order: Tomatoes, tomato/vegetable juice; Milk drinks; Condiments and sauces; and Other vegetables; <sup>b</sup> Data are Day 1 intakes by adults aged 19+ years ( $n = 9490$ ); <sup>c</sup> Data are Day 1 intakes by adults aged 19–50 years ( $n = 5429$ ); <sup>d</sup> Data are Day 1 intakes by adults aged 51+ years ( $n = 4061$ ).

**Table S5.** Food sources of vitamin A (retinoic acid equivalents; RAE) among US adults (from NHANES 2003–2006).

| Food group <sup>a</sup>                  | 19+ years <sup>b</sup> |         |              | 19–50 years <sup>c</sup> |         |              | 51+ years <sup>d</sup> |         |              |
|------------------------------------------|------------------------|---------|--------------|--------------------------|---------|--------------|------------------------|---------|--------------|
|                                          | Vitamin A              |         |              | Vitamin A                |         |              | Vitamin A              |         |              |
|                                          | (mean = 615 µg RAE)    |         |              | (mean = 605 µg RAE)      |         |              | (mean = 631 µg RAE)    |         |              |
|                                          | Ranking                | % Total | Cumulative % | Ranking                  | % Total | Cumulative % | Ranking                | % Total | Cumulative % |
| Milk                                     | 1                      | 13.9    | 13.9         | 1                        | 14.2    | 14.2         | 1                      | 13.5    | 13.5         |
| Carrots, sweet potatoes, winter squash   | 2                      | 11.6    | 25.5         | 2                        | 11.2    | 25.4         | 2                      | 12.3    | 25.8         |
| Cheese                                   | 3                      | 9.2     | 34.7         | 3                        | 10.9    | 36.3         | 5                      | 6.6     | 19.2         |
| Margarine and butter                     | 4                      | 8.9     | 43.6         | 5                        | 7.8     | 44.1         | 3                      | 10.4    | 29.6         |
| Ready-to-eat cereal                      | 5                      | 8.2     | 51.8         | 4                        | 8.2     | 52.3         | 4                      | 8.2     | 37.8         |
| Cakes, cookies, quick bread, pastry, pie | 6                      | 4.7     | 56.5         | 6                        | 4.9     | 57.2         | 7                      | 4.5     | 42.3         |
| Eggs                                     | 7                      | 4.6     | 61.1         | 7                        | 4.4     | 61.6         | 6                      | 4.8     | 47.1         |
| Broccoli, spinach, greens                | 8                      | 3.9     | 65.0         | 8                        | 3.6     | 65.2         | 8                      | 4.4     | 51.5         |
| Milk desserts                            | 9                      | 3.7     | 68.7         | 10                       | 3.5     | 68.7         | 9                      | 4.1     | 55.6         |
| Organ meats                              | 10                     | 3.7     | 72.4         | 9                        | 3.5     | 72.2         | 10                     | 3.9     | 59.5         |
| Tomatoes, tomato/vegetable juice         | 11                     | 3.2     | 75.6         | 11                       | 3.2     | 75.4         | 11                     | 3.3     | 62.8         |
| Other fats and oils                      | 12                     | 2.4     | 78.0         | 12                       | 2.5     | 77.9         | 14                     | 2.2     | 65.0         |
| Fruit                                    | 13                     | 2.0     | 80.0         | 17                       | 1.4     | 79.3         | 12                     | 2.9     | 67.9         |

<sup>a</sup> Food groups ( $n = 6$ ) contributing at least 1% in descending order: Hot breakfast cereal; Meal replacements/supplements; Milk drinks; Lettuce; Biscuits, corn bread, pancakes, tortillas; and Poultry; <sup>b</sup> Data are Day 1 intakes by adults aged 19+ years ( $n = 9490$ ); <sup>c</sup> Data are Day 1 intakes by adults aged 19–50 years ( $n = 5429$ ); <sup>d</sup> Data are Day 1 intakes by adults aged 51+ years ( $n = 4061$ ).

**Table S6.** Food sources of vitamin E (alpha-tocopherol; AT) among US adults (from NHANES 2003–2006).

| Food group <sup>a</sup>                 | 19+ years <sup>b</sup> |         |              | 19–50 years <sup>c</sup> |         |              | 51+ years <sup>d</sup> |         |              |
|-----------------------------------------|------------------------|---------|--------------|--------------------------|---------|--------------|------------------------|---------|--------------|
|                                         | Vitamin E              |         |              | Vitamin E                |         |              | Vitamin E              |         |              |
|                                         | (mean = 7.3 mg AT)     |         |              | (mean = 7.6 mg AT)       |         |              | (mean = 6.8 mg AT)     |         |              |
|                                         | Ranking                | % Total | Cumulative % | Ranking                  | % Total | Cumulative % | Ranking                | % Total | Cumulative % |
| Nuts, seeds (including butters, pastes) | 1                      | 10.0    | 10.0         | 3                        | 9.2     | 9.2          | 1                      | 11.3    | 11.3         |
| Tomatoes, tomato/vegetable juice        | 2                      | 9.0     | 19.0         | 1                        | 9.4     | 18.6         | 3                      | 8.3     | 19.6         |
| Crackers, popcorn, pretzels, chips      | 3                      | 8.2     | 27.2         | 2                        | 9.2     | 27.8         | 6                      | 6.4     | 26.0         |
| Salad dressings, mayonnaise             | 4                      | 8.1     | 35.3         | 4                        | 8.2     | 36.0         | 4                      | 7.9     | 33.9         |
| Margarine and butter                    | 5                      | 6.8     | 42.1         | 7                        | 5.7     | 41.7         | 2                      | 8.9     | 42.8         |
| Cake, cookies, quick bread, pastry, pie | 6                      | 6.7     | 48.8         | 5                        | 6.7     | 48.4         | 5                      | 6.6     | 49.4         |
| Other fats and oils                     | 7                      | 5.8     | 54.6         | 6                        | 6.2     | 54.6         | 8                      | 5.1     | 54.5         |
| Ready-to-eat cereal                     | 8                      | 4.0     | 58.6         | 8                        | 3.3     | 57.9         | 7                      | 5.3     | 59.8         |
| Eggs                                    | 9                      | 2.8     | 61.4         | 10                       | 2.5     | 60.4         | 10                     | 3.3     | 63.1         |
| Poultry                                 | 10                     | 2.8     | 64.2         | 9                        | 3.2     | 63.6         | 14                     | 2.0     | 65.1         |
| Fruit                                   | 11                     | 2.4     | 66.6         | 16                       | 1.8     | 65.4         | 9                      | 3.5     | 68.6         |
| Fish and shellfish                      | 12                     | 2.4     | 69.0         | 13                       | 2.2     | 67.6         | 11                     | 2.8     | 71.4         |
| Beef                                    | 13                     | 2.3     | 71.3         | 11                       | 2.5     | 70.1         | 15                     | 2.0     | 73.4         |
| Meal replacements/supplements           | 14                     | 2.1     | 73.4         | 12                       | 2.3     | 72.4         | 17                     | 1.7     | 75.1         |
| Broccoli, spinach, greens               | 15                     | 2.1     | 75.5         | 14                       | 1.9     | 74.3         | 12                     | 2.3     | 77.4         |

<sup>a</sup> Food groups ( $n = 12$ ) contributing at least 1% in descending order: Yeast breads and rolls; Biscuits, corn bread, pancakes, tortillas; Fruit juice; Other vegetables; Condiments and sauces; Candy, sugars and sugary foods; Coffee, tea, other, nonalcoholic beverages.; Potatoes (white); Cheese; Legumes; Carrots, sweet potatoes, winter squash; and Milk desserts; <sup>b</sup> Data are Day 1 intakes by adults aged 19+ years ( $n = 9490$ ); <sup>c</sup> Data are Day 1 intakes by adults aged 19–50 years ( $n = 5429$ ); <sup>d</sup> Data are Day 1 intakes by adults aged 51+ years ( $n = 4061$ ).

**Table S7.** Food sources of vitamin C among US adults (from NHANES 2003–2006).

| Food group <sup>a</sup>          | 19+ years <sup>b</sup> |         |              | 19–50 years <sup>c</sup> |         |              | 51+ years <sup>d</sup> |         |              |
|----------------------------------|------------------------|---------|--------------|--------------------------|---------|--------------|------------------------|---------|--------------|
|                                  | Vitamin C              |         |              | Vitamin C                |         |              | Vitamin C              |         |              |
|                                  | (mean = 87.7 mg)       |         |              | (mean = 89.1 mg)         |         |              | (mean = 85.4 mg)       |         |              |
|                                  | Ranking                | % Total | Cumulative % | Ranking                  | % Total | Cumulative % | Ranking                | % Total | Cumulative % |
| Fruit juice                      | 1                      | 28.6    | 28.6         | 1                        | 29.4    | 29.4         | 1                      | 27.2    | 27.2         |
| Fruit                            | 2                      | 15.3    | 43.9         | 3                        | 12.3    | 41.7         | 2                      | 20.1    | 47.3         |
| Fruit drinks and ades            | 3                      | 14.0    | 57.9         | 2                        | 16.5    | 58.2         | 4                      | 10.0    | 57.3         |
| Other vegetables                 | 4                      | 11.3    | 69.2         | 4                        | 11.6    | 69.8         | 3                      | 10.8    | 68.1         |
| Tomatoes, tomato/vegetable juice | 5                      | 7.2     | 76.4         | 5                        | 7.1     | 76.9         | 5                      | 7.3     | 75.4         |
| Broccoli, spinach, greens        | 6                      | 5.1     | 81.5         | 6                        | 4.9     | 81.8         | 6                      | 5.4     | 80.8         |
| Potatoes (white)                 | 7                      | 4.5     | 86.0         | 7                        | 4.2     | 86.0         | 7                      | 5.1     | 85.9         |
| Ready-to-eat cereals             | 8                      | 2.4     | 88.4         | 8                        | 2.1     | 88.1         | 8                      | 3.0     | 88.9         |

<sup>a</sup> Food groups ( $n = 4$ ) contributing at least 1% in descending order: Condiments and sauces; Cake, cookies, quick bread, pastry, pie; Corn, peas, lima beans; and Lettuce;

<sup>b</sup> Data are Day 1 intakes by adults aged 19+ years ( $n = 9490$ ); <sup>c</sup> Data are Day 1 intakes by adults aged 19–50 years ( $n = 5429$ ); <sup>d</sup> Data are Day 1 intakes by adults aged 51+ years ( $n = 4061$ ).

**Table S8.** Food sources of thiamin among US adults (from NHANES 2003–2006).

| Food group <sup>a</sup>                   | 19+ years <sup>b</sup> |         |              | 19–50 years <sup>c</sup> |         |              | 51+ years <sup>d</sup> |         |              |
|-------------------------------------------|------------------------|---------|--------------|--------------------------|---------|--------------|------------------------|---------|--------------|
|                                           | Thiamin                |         |              | Thiamin                  |         |              | Thiamin                |         |              |
|                                           | (mean = 1.7 mg)        |         |              | (mean = 1.8 mg)          |         |              | (mean = 1.6 mg)        |         |              |
|                                           | Ranking                | % Total | Cumulative % | Ranking                  | % Total | Cumulative % | Ranking                | % Total | Cumulative % |
| Yeast breads and rolls                    | 1                      | 14.7    | 14.7         | 1                        | 14.1    | 14.1         | 1                      | 15.8    | 15.8         |
| Ready-to-eat cereal                       | 2                      | 9.9     | 24.6         | 2                        | 8.8     | 22.9         | 2                      | 11.8    | 27.6         |
| Pork, ham, bacon                          | 3                      | 8.0     | 32.6         | 3                        | 7.9     | 30.8         | 3                      | 8.1     | 35.7         |
| Cake, cookies, quick bread, pastry, pie   | 4                      | 6.2     | 38.8         | 6                        | 6.5     | 37.3         | 4                      | 5.8     | 41.5         |
| Biscuits, corn bread, pancakes, tortillas | 5                      | 5.7     | 44.5         | 4                        | 6.6     | 43.9         | 5                      | 4.3     | 45.8         |
| Flour, bran, baking ingredients           | 6                      | 5.5     | 50.0         | 5                        | 6.5     | 50.4         | 8                      | 3.6     | 49.4         |
| Pasta                                     | 7                      | 4.3     | 54.3         | 7                        | 4.4     | 54.8         | 7                      | 4.0     | 53.4         |
| Milk                                      | 8                      | 4.0     | 58.3         | 8                        | 4.0     | 58.8         | 6                      | 4.1     | 57.5         |
| Potatoes (white)                          | 9                      | 3.0     | 61.3         | 9                        | 3.0     | 61.8         | 10                     | 3.0     | 60.5         |
| Frankfurters, sausages, luncheon meats    | 10                     | 2.9     | 64.2         | 10                       | 3.0     | 64.8         | 11                     | 2.7     | 63.2         |
| Fruit juice                               | 11                     | 2.6     | 66.8         | 12                       | 2.6     | 67.4         | 12                     | 2.7     | 65.9         |
| Rice, cooked grains                       | 12                     | 2.5     | 69.3         | 11                       | 2.8     | 70.2         | 16                     | 2.0     | 67.9         |
| Coffee, tea, other, nonalcoholic bevg.    | 13                     | 2.3     | 71.6         | 17                       | 1.9     | 72.1         | 9                      | 3.0     | 70.9         |
| Crackers, popcorn, pretzels, chips        | 14                     | 2.2     | 73.8         | 13                       | 2.3     | 74.4         | 14                     | 2.1     | 73.0         |
| Legumes                                   | 15                     | 2.1     | 75.9         | 14                       | 2.1     | 76.5         | 15                     | 2.1     | 75.1         |
| Yeast breads and rolls                    | 1                      | 14.7    | 14.7         | 1                        | 14.1    | 14.1         | 1                      | 15.8    | 15.8         |

<sup>a</sup> Food groups ( $n = 11$ ) contributing at least 1% in descending order: Poultry; Fruit; Mixtures, mostly grain; Beef; Meal replacements/supplements; Other vegetables; Tomatoes, tomato vegetable juice; Hot breakfast cereal; Nuts, seeds (including butters, pastes); Fish and shellfish; and Corn, peas, lima beans; <sup>b</sup> Data are Day 1 intakes by adults aged 19+ years ( $n = 9490$ ); <sup>c</sup> Data are Day 1 intakes by adults aged 19–50 years ( $n = 5429$ ); <sup>d</sup> Data are Day 1 intakes by adults aged 51+ years ( $n = 4061$ ).

**Table S9.** Food sources of riboflavin among US adults (from NHANES 2003–2006).

| Food group <sup>a</sup>                   | 19+ years <sup>b</sup> |         |              | 19–50 years <sup>c</sup> |         |              | 51+ years <sup>d</sup> |         |              |
|-------------------------------------------|------------------------|---------|--------------|--------------------------|---------|--------------|------------------------|---------|--------------|
|                                           | Riboflavin             |         |              | Riboflavin               |         |              | Riboflavin             |         |              |
|                                           | (mean = 2.3 mg)        |         |              | (mean = 2.4 mg)          |         |              | (mean = 2.2 mg)        |         |              |
|                                           | Ranking                | % Total | Cumulative % | Ranking                  | % Total | Cumulative % | Ranking                | % Total | Cumulative % |
| Milk                                      | 1                      | 14.1    | 14.1         | 1                        | 14.1    | 14.1         | 1                      | 14.2    | 14.2         |
| Coffee, tea, other, nonalcoholic bevg.    | 2                      | 10.2    | 24.3         | 2                        | 8.6     | 22.7         | 2                      | 12.8    | 27.0         |
| Yeast breads and rolls                    | 3                      | 7.9     | 32.2         | 3                        | 7.7     | 30.4         | 4                      | 8.4     | 35.4         |
| Ready-to-eat cereal                       | 4                      | 7.9     | 40.1         | 4                        | 7.2     | 37.6         | 3                      | 9.1     | 44.5         |
| Cheese                                    | 5                      | 5.2     | 45.3         | 5                        | 5.8     | 43.4         | 6                      | 4.1     | 48.6         |
| Eggs                                      | 6                      | 4.3     | 49.6         | 7                        | 3.9     | 47.3         | 5                      | 4.9     | 53.5         |
| Cake, cookies, quick bread, pastry, pie   | 7                      | 4.3     | 53.9         | 6                        | 4.4     | 51.7         | 7                      | 4.1     | 57.6         |
| Beef                                      | 8                      | 3.6     | 57.5         | 8                        | 3.8     | 55.5         | 8                      | 3.2     | 60.8         |
| Biscuits, corn bread, pancakes, tortillas | 9                      | 3.3     | 60.8         | 9                        | 3.6     | 59.1         | 10                     | 2.8     | 63.6         |
| Poultry                                   | 10                     | 3.1     | 63.9         | 11                       | 3.4     | 62.5         | 11                     | 2.6     | 66.2         |
| Flour, bran, baking ingredients           | 11                     | 2.9     | 66.8         | 10                       | 3.5     | 66.0         | 14                     | 1.9     | 68.1         |
| Milk desserts                             | 12                     | 2.4     | 69.2         | 16                       | 2.0     | 68.0         | 9                      | 2.9     | 71.0         |
| Pork, ham, bacon                          | 13                     | 2.3     | 71.5         | 12                       | 2.4     | 70.4         | 12                     | 2.3     | 73.3         |
| Crackers, popcorn, pretzels, chips        | 14                     | 2.1     | 73.6         | 13                       | 2.3     | 72.7         | 16                     | 1.8     | 75.1         |
| Frankfurters, sausages, luncheon meats    | 15                     | 2.1     | 75.7         | 15                       | 2.2     | 74.9         | 15                     | 1.8     | 76.9         |

<sup>a</sup> Food groups ( $n = 10$ ) contributing at least 1% in descending order: Alcoholic beverages; Milk drinks; Pasta; Fruit; Soft drinks, soda (including diet); Other vegetables; Tomatoes, tomato/vegetable juice; Mixtures, mostly grain; Fruit drinks and ades; and Meal replacements/supplements; <sup>b</sup> Data are Day 1 intakes by adults aged 19+ years ( $n = 9490$ ); <sup>c</sup> Data are Day 1 intakes by adults aged 19–50 years ( $n = 5429$ ); <sup>d</sup> Data are Day 1 intakes by adults aged 51+ years ( $n = 4061$ ).

**Table S10.** Food sources of niacin among US adults (from NHANES 2003–2006).

| Food group <sup>a</sup>                   | 19+ years <sup>b</sup> |         |              | 19–50 years <sup>c</sup> |         |              | 51+ years <sup>d</sup> |         |              |
|-------------------------------------------|------------------------|---------|--------------|--------------------------|---------|--------------|------------------------|---------|--------------|
|                                           | Niacin                 |         |              | Niacin                   |         |              | Niacin                 |         |              |
|                                           | (mean = 25.2 mg)       |         |              | (mean = 27.1 mg)         |         |              | (mean = 22.4 mg)       |         |              |
|                                           | Ranking                | % Total | Cumulative % | Ranking                  | % Total | Cumulative % | Ranking                | % Total | Cumulative % |
| Poultry                                   | 1                      | 15.4    | 15.4         | 1                        | 16.2    | 16.2         | 1                      | 13.9    | 13.9         |
| Yeast breads and rolls                    | 2                      | 9.9     | 25.3         | 3                        | 9.2     | 25.4         | 2                      | 11.2    | 25.1         |
| Beef                                      | 3                      | 9.2     | 34.5         | 2                        | 9.6     | 35.0         | 4                      | 8.4     | 33.5         |
| Ready-to-eat cereal                       | 4                      | 8.0     | 42.5         | 4                        | 7.0     | 42.0         | 3                      | 9.9     | 43.4         |
| Pork, ham, bacon                          | 5                      | 4.3     | 46.8         | 5                        | 4.2     | 46.2         | 6                      | 4.6     | 48.0         |
| Coffee, tea, other, nonalcoholic bevg.    | 6                      | 3.9     | 50.7         | 12                       | 3.5     | 49.7         | 5                      | 4.7     | 52.7         |
| Fish and shellfish                        | 7                      | 3.9     | 54.6         | 10                       | 3.6     | 53.3         | 7                      | 4.5     | 57.2         |
| Frankfurters, sausages, luncheon meats    | 8                      | 3.6     | 58.2         | 7                        | 3.8     | 57.1         | 10                     | 3.4     | 60.6         |
| Cake, cookies, quick bread, pastry, pie   | 9                      | 3.6     | 61.8         | 8                        | 3.6     | 60.7         | 9                      | 3.5     | 64.1         |
| Alcoholic beverages                       | 10                     | 3.3     | 65.1         | 6                        | 4.1     | 64.8         | 17                     | 1.8     | 65.9         |
| Biscuits, corn bread, pancakes, tortillas | 11                     | 3.3     | 68.4         | 11                       | 3.5     | 68.3         | 13                     | 2.7     | 68.6         |
| Flour, bran, baking ingredients           | 12                     | 3.1     | 71.5         | 9                        | 3.6     | 71.9         | 15                     | 2.1     | 70.7         |
| Nuts, seeds (including butters, pastes)   | 13                     | 3.0     | 74.5         | 16                       | 2.6     | 74.5         | 8                      | 3.8     | 74.5         |
| Potatoes (white)                          | 14                     | 2.8     | 77.3         | 13                       | 2.8     | 77.3         | 12                     | 2.8     | 77.3         |
| Tomatoes, tomato/vegetable juice          | 15                     | 2.8     | 80.1         | 14                       | 2.7     | 80.0         | 11                     | 2.9     | 80.2         |
| Crackers, popcorn, pretzels, chips        | 16                     | 2.5     | 82.6         | 15                       | 2.6     | 82.6         | 14                     | 2.4     | 82.6         |

<sup>a</sup> Food groups ( $n = 7$ ) contributing at least 1% in descending order: Pasta; Rice, cooked grains; Fruit; Mixtures, mostly grain; Soup, broth, bouillon; Fruit drinks and ades; and Other vegetables; <sup>b</sup> Data are Day 1 intakes by adults aged 19+ years ( $n = 9490$ ); <sup>c</sup> Data are Day 1 intakes by adults aged 19–50 years ( $n = 5429$ ); <sup>d</sup> Data are Day 1 intakes by adults aged 51+ years ( $n = 4061$ ).

**Table S11.** Food sources of vitamin B<sub>6</sub> among US adults (from NHANES 2003–2006).

| Food group <sup>a</sup>                   | 19+ years <sup>b</sup> |         |              | 19–50 years <sup>c</sup> |         |              | 51+ years <sup>d</sup> |         |              |
|-------------------------------------------|------------------------|---------|--------------|--------------------------|---------|--------------|------------------------|---------|--------------|
|                                           | Vitamin B <sub>6</sub> |         |              | Vitamin B <sub>6</sub>   |         |              | Vitamin B <sub>6</sub> |         |              |
|                                           | (mean = 2.0 mg)        |         |              | (mean = 2.1 mg)          |         |              | (mean = 1.8 mg)        |         |              |
|                                           | Ranking                | % Total | Cumulative % | Ranking                  | % Total | Cumulative % | Ranking                | % Total | Cumulative % |
| Ready-to-eat cereal                       | 1                      | 12.7    | 12.7         | 1                        | 11.1    | 11.1         | 1                      | 15.4    | 15.4         |
| Poultry                                   | 2                      | 9.5     | 22.2         | 2                        | 10.2    | 21.3         | 2                      | 8.4     | 23.8         |
| Beef                                      | 3                      | 8.6     | 30.8         | 3                        | 9.2     | 30.5         | 3                      | 7.4     | 31.2         |
| Potatoes (white)                          | 4                      | 6.6     | 37.4         | 4                        | 6.5     | 37.0         | 5                      | 6.7     | 37.9         |
| Fruit                                     | 5                      | 5.0     | 42.4         | 7                        | 3.8     | 40.8         | 4                      | 7.1     | 45.0         |
| Alcoholic beverages                       | 6                      | 4.1     | 46.5         | 5                        | 5.1     | 45.9         | 14                     | 2.4     | 47.4         |
| Pork, ham, bacon                          | 7                      | 3.9     | 50.4         | 6                        | 3.9     | 49.8         | 6                      | 4.0     | 51.4         |
| Milk                                      | 8                      | 3.3     | 53.7         | 8                        | 3.2     | 53.0         | 7                      | 3.4     | 54.8         |
| Other vegetables                          | 9                      | 3.1     | 56.8         | 9                        | 3.1     | 56.1         | 9                      | 3.1     | 57.9         |
| Tomatoes, tomato/vegetable juice          | 10                     | 3.1     | 59.9         | 10                       | 3.1     | 59.2         | 8                      | 3.1     | 61.0         |
| Fruit juice                               | 11                     | 2.9     | 62.8         | 13                       | 2.9     | 62.1         | 10                     | 3.0     | 64.0         |
| Frankfurters, sausages, luncheon meats    | 12                     | 2.8     | 65.6         | 12                       | 2.9     | 65.0         | 12                     | 2.6     | 66.6         |
| Crackers, popcorn, pretzels, chips        | 13                     | 2.7     | 68.3         | 11                       | 2.9     | 67.9         | 15                     | 2.1     | 68.7         |
| Yeast breads and rolls                    | 14                     | 2.5     | 70.8         | 15                       | 2.3     | 70.2         | 11                     | 2.9     | 71.6         |
| Cake, cookies, quick bread, pastry, pie   | 15                     | 2.5     | 73.3         | 14                       | 2.7     | 72.9         | 16                     | 2.1     | 73.7         |
| Biscuits, corn bread, pancakes, tortillas | 16                     | 2.1     | 75.4         | 16                       | 2.1     | 75.0         | 17                     | 2.0     | 75.7         |
| Fish and shellfish                        | 17                     | 2.1     | 77.5         | 18                       | 1.9     | 76.9         | 13                     | 2.4     | 78.1         |

<sup>a</sup> Food groups ( $n = 9$ ) contributing at least 1% in descending order: Nuts, seeds (including butters, pastes); Legumes; Fruit drinks and ades; Eggs; Rice, cooked grains; Coffee, tea, other, nonalcoholic bevg.; Salad dressings, mayonnaise; Margarine and butter; and Cheese; <sup>b</sup> Data are Day 1 intakes by adults aged 19+ years ( $n = 9490$ );

<sup>c</sup> Data are Day 1 intakes by adults aged 19–50 years ( $n = 5429$ ); <sup>d</sup> Data are Day 1 intakes by adults aged 51+ years ( $n = 4061$ ).

**Table S12.** Food sources of folate (dietary folate equivalents; DFE) among US adults (from NHANES 2003–2006).

| Food group <sup>a</sup>                   | 19+ years <sup>b</sup> |         |              | 19–50 years <sup>c</sup> |         |              | 51+ years <sup>d</sup> |         |              |
|-------------------------------------------|------------------------|---------|--------------|--------------------------|---------|--------------|------------------------|---------|--------------|
|                                           | Folate                 |         |              | Folate                   |         |              | Folate                 |         |              |
|                                           | (mean = 407 µg DFE)    |         |              | (mean = 422 µg DFE)      |         |              | (mean = 383 µg DFE)    |         |              |
|                                           | Ranking                | % Total | Cumulative % | Ranking                  | % Total | Cumulative % | Ranking                | % Total | Cumulative % |
| Ready-to-eat cereal                       | 1                      | 18.7    | 18.7         | 1                        | 16.7    | 16.7         | 1                      | 22.1    | 22.1         |
| Yeast breads and rolls                    | 2                      | 16.6    | 35.3         | 2                        | 16.2    | 32.9         | 2                      | 17.2    | 39.3         |
| Cake, cookies, quick bread, pastry, pie   | 3                      | 6.1     | 41.4         | 5                        | 6.2     | 39.1         | 3                      | 5.9     | 45.2         |
| Pasta                                     | 4                      | 5.7     | 47.1         | 6                        | 5.9     | 45.0         | 4                      | 5.3     | 50.5         |
| Flour, bran, baking ingredients           | 5                      | 5.6     | 52.7         | 3                        | 6.7     | 51.7         | 6                      | 3.6     | 54.1         |
| Biscuits, corn bread, pancakes, tortillas | 6                      | 5.4     | 58.1         | 4                        | 6.3     | 58.0         | 5                      | 4.0     | 58.1         |
| Rice, cooked grains                       | 7                      | 4.6     | 62.7         | 7                        | 5.2     | 63.2         | 7                      | 3.5     | 61.6         |
| Crackers, popcorn, pretzels, chips        | 8                      | 3.0     | 65.7         | 8                        | 3.2     | 66.4         | 9                      | 2.8     | 64.4         |
| Fruit juice                               | 9                      | 2.6     | 68.3         | 10                       | 2.5     | 68.9         | 10                     | 2.7     | 67.1         |
| Coffee, tea, other, nonalcoholic bevg.    | 10                     | 2.5     | 70.8         | 12                       | 2.2     | 71.1         | 8                      | 3.1     | 70.2         |
| Legumes                                   | 11                     | 2.5     | 73.3         | 9                        | 2.6     | 73.7         | 14                     | 2.2     | 72.4         |
| Other vegetables                          | 12                     | 2.3     | 75.6         | 13                       | 2.1     | 75.8         | 11                     | 2.7     | 75.1         |
| Alcoholic beverages                       | 13                     | 2.0     | 77.6         | 11                       | 2.5     | 78.3         | 23                     | 1.0     | 76.1         |
| Broccoli, spinach, greens                 | 14                     | 2.0     | 79.6         | 15                       | 1.8     | 80.1         | 13                     | 2.2     | 78.3         |

<sup>a</sup> Food groups ( $n = 10$ ) contributing at least 1% in descending order: Fruit; Milk; Mixtures, mostly grains; Lettuce; Eggs; Nuts, seeds (including butters, pastes); Potatoes (white); Tomatoes, tomato/vegetable juices; Hot breakfast cereals; and Corn, peas, lima beans; <sup>b</sup> Data are Day 1 intakes by adults aged 19+ years ( $n = 9490$ ); <sup>c</sup> Data are Day 1 intakes by adults aged 19–50 years ( $n = 5429$ ); <sup>d</sup> Data are Day 1 intakes by adults aged 51+ years ( $n = 4061$ ).

**Table S13.** Food sources of vitamin B<sub>12</sub> among US adults (from NHANES 2003–2006).

| Food group <sup>a</sup>                | 19+ years <sup>b</sup>  |         |              | 19–50 years <sup>c</sup> |         |              | 51+ years <sup>d</sup>  |         |              |
|----------------------------------------|-------------------------|---------|--------------|--------------------------|---------|--------------|-------------------------|---------|--------------|
|                                        | Vitamin B <sub>12</sub> |         |              | Vitamin B <sub>12</sub>  |         |              | Vitamin B <sub>12</sub> |         |              |
|                                        | (mean = 5.4 µg)         |         |              | (mean = 5.6 µg)          |         |              | (mean = 5.1 µg)         |         |              |
|                                        | Ranking                 | % Total | Cumulative % | Ranking                  | % Total | Cumulative % | Ranking                 | % Total | Cumulative % |
| Beef                                   | 1                       | 19.8    | 19.8         | 1                        | 21.4    | 21.4         | 1                       | 17.0    | 17.0         |
| Milk                                   | 2                       | 14.7    | 34.5         | 2                        | 14.6    | 36.0         | 2                       | 15.0    | 32.0         |
| Ready-to-eat cereal                    | 3                       | 12.5    | 47.0         | 3                        | 11.2    | 47.2         | 3                       | 14.6    | 46.6         |
| Fish and shellfish                     | 4                       | 11.5    | 58.5         | 4                        | 10.1    | 57.3         | 4                       | 14.0    | 60.6         |
| Cheese                                 | 5                       | 6.7     | 65.2         | 5                        | 7.5     | 64.8         | 5                       | 5.3     | 65.9         |
| Frankfurters, sausages, luncheon meats | 6                       | 4.7     | 69.9         | 6                        | 4.7     | 69.5         | 7                       | 4.6     | 70.5         |
| Eggs                                   | 7                       | 4.2     | 74.1         | 7                        | 3.8     | 73.3         | 6                       | 4.7     | 75.2         |
| Organ meats                            | 8                       | 3.5     | 77.6         | 8                        | 3.3     | 76.6         | 8                       | 3.8     | 79.0         |
| Pork, ham, bacon                       | 9                       | 2.7     | 80.3         | 10                       | 2.7     | 79.3         | 9                       | 2.6     | 81.6         |
| Poultry                                | 10                      | 2.6     | 82.9         | 9                        | 2.8     | 82.1         | 11                      | 2.1     | 83.7         |

<sup>a</sup> Food groups ( $n = 6$ ) contributing at least 1% in descending order: Cake, cookies, quick bread, pastry, pie; Milk desserts; Mixtures, mostly grains; Milk drinks; Margarine and butter; and Fruit drinks and ades; <sup>b</sup> Data are Day 1 intakes by adults aged 19+ years ( $n = 9490$ ); <sup>c</sup> Data are Day 1 intakes by adults aged 19–50 years ( $n = 5429$ );

<sup>d</sup> Data are Day 1 intakes by adults aged 51+ years ( $n = 4061$ ).

**Table S14.** Food sources of phosphorus among US adults (from NHANES 2003–2006).

| Food group <sup>a</sup>                   | 19+ years <sup>b</sup> |         |              | 19–50 years <sup>c</sup> |         |              | 51+ years <sup>d</sup> |         |              |
|-------------------------------------------|------------------------|---------|--------------|--------------------------|---------|--------------|------------------------|---------|--------------|
|                                           | Phosphorus             |         |              | Phosphorus               |         |              | Phosphorus             |         |              |
|                                           | (mean = 1350 mg)       |         |              | (mean = 1436 mg)         |         |              | (mean = 1215 mg)       |         |              |
|                                           | Ranking                | % Total | Cumulative % | Ranking                  | % Total | Cumulative % | Ranking                | % Total | Cumulative % |
| Milk                                      | 1                      | 12.3    | 12.3         | 2                        | 11.9    | 11.9         | 1                      | 13.1    | 13.1         |
| Cheese                                    | 2                      | 11.3    | 23.6         | 1                        | 12.5    | 24.4         | 2                      | 9.2     | 22.3         |
| Beef                                      | 3                      | 6.7     | 30.3         | 4                        | 7.0     | 31.4         | 3                      | 6.2     | 28.5         |
| Poultry                                   | 4                      | 6.6     | 36.9         | 3                        | 7.1     | 38.5         | 4                      | 5.8     | 34.3         |
| Biscuits, corn bread, pancakes, tortillas | 5                      | 4.6     | 41.5         | 5                        | 4.9     | 43.4         | 6                      | 4.1     | 38.4         |
| Yeast breads and rolls                    | 6                      | 4.5     | 46.0         | 6                        | 4.0     | 47.4         | 5                      | 5.4     | 43.8         |
| Pork, ham, bacon                          | 7                      | 3.8     | 49.8         | 7                        | 3.7     | 51.1         | 7                      | 3.9     | 47.4         |
| Cake, cookies, quick bread, pastry, pie   | 8                      | 3.6     | 53.4         | 8                        | 3.5     | 54.6         | 8                      | 3.9     | 51.6         |
| Fish and shellfish                        | 9                      | 3.2     | 56.6         | 9                        | 2.9     | 57.5         | 9                      | 3.9     | 55.5         |
| Eggs                                      | 10                     | 2.9     | 59.5         | 13                       | 2.6     | 60.1         | 10                     | 3.4     | 58.9         |
| Frankfurters, sausages, luncheon meats    | 11                     | 2.8     | 62.3         | 10                       | 2.9     | 63.0         | 13                     | 2.6     | 61.5         |
| Nuts, seeds (including butters, pastes)   | 12                     | 2.6     | 64.9         | 16                       | 2.3     | 65.3         | 11                     | 3.1     | 64.6         |
| Crackers, popcorn, pretzels, chips        | 13                     | 2.5     | 67.4         | 12                       | 2.7     | 68.0         | 15                     | 2.3     | 66.9         |
| Soft drinks, soda (including diet)        | 14                     | 2.3     | 69.7         | 11                       | 2.7     | 70.7         | 18                     | 1.7     | 68.6         |
| Ready-to-eat cereal                       | 15                     | 2.3     | 72.0         | 18                       | 1.8     | 72.5         | 12                     | 3.1     | 71.7         |
| Potatoes (white)                          | 16                     | 2.3     | 74.3         | 15                       | 2.4     | 74.9         | 16                     | 2.1     | 73.8         |
| Milk desserts                             | 17                     | 2.0     | 76.3         | 19                       | 1.7     | 76.6         | 14                     | 2.6     | 76.4         |
| Alcoholic beverages                       | 18                     | 2.0     | 78.3         | 14                       | 2.4     | 79.0         | 23                     | 1.2     | 77.6         |

<sup>a</sup> Food groups ( $n = 10$ ) contributing at least 1% in descending order: Legumes; Flour, bran, baking ingredients; Pasta; Mixtures, mostly grain; Tomatoes, tomato/vegetable juice; Other vegetables; Candy, sugars and sugary foods; Fruit; Milk drinks; and Hot breakfast cereal; <sup>b</sup> Data are Day 1 intakes by adults aged 19+ years ( $n = 9490$ ); <sup>c</sup> Data are Day 1 intakes by adults aged 19–50 years ( $n = 5429$ ); <sup>d</sup> Data are Day 1 intakes by adults aged 51+ years ( $n = 4061$ ).

**Table S15.** Food sources of magnesium among US adults (from NHANES 2003–2006).

| Food group <sup>a</sup>                   | 19+ years <sup>b</sup> |         |              | 19–50 years <sup>c</sup> |         |              | 51+ years <sup>d</sup> |         |              |
|-------------------------------------------|------------------------|---------|--------------|--------------------------|---------|--------------|------------------------|---------|--------------|
|                                           | Magnesium              |         |              | Magnesium                |         |              | Magnesium              |         |              |
|                                           | (mean = 292 mg)        |         |              | (mean = 303 mg)          |         |              | (mean = 275 mg)        |         |              |
|                                           | Ranking                | % Total | Cumulative % | Ranking                  | % Total | Cumulative % | Ranking                | % Total | Cumulative % |
| Coffee, tea, other, nonalcoholic bevg.    | 1                      | 9.2     | 9.2          | 1                        | 8.4     | 8.4          | 1                      | 10.4    | 10.4         |
| Milk                                      | 2                      | 6.5     | 15.7         | 2                        | 6.4     | 14.8         | 3                      | 6.6     | 17.0         |
| Yeast breads and rolls                    | 3                      | 6.0     | 21.7         | 3                        | 5.4     | 20.2         | 2                      | 6.9     | 23.9         |
| Nuts, seeds (including butters, pastes)   | 4                      | 5.2     | 26.9         | 6                        | 4.6     | 24.8         | 4                      | 6.3     | 30.2         |
| Crackers, popcorn, pretzels, chips        | 5                      | 4.7     | 31.6         | 4                        | 5.3     | 30.1         | 7                      | 3.8     | 34.0         |
| Alcoholic beverages                       | 6                      | 4.0     | 35.6         | 5                        | 4.9     | 35.0         | 16                     | 2.3     | 36.3         |
| Cake, cookies, quick bread, pastry, pie   | 7                      | 3.8     | 39.4         | 8                        | 4.0     | 39.0         | 9                      | 3.6     | 39.9         |
| Poultry                                   | 8                      | 3.8     | 43.2         | 7                        | 4.2     | 43.2         | 10                     | 3.2     | 43.1         |
| Potatoes (white)                          | 9                      | 3.7     | 46.9         | 9                        | 3.7     | 36.9         | 8                      | 3.6     | 46.7         |
| Fruit                                     | 10                     | 3.5     | 50.4         | 17                       | 2.7     | 49.6         | 5                      | 4.9     | 51.6         |
| Ready-to-eat cereal                       | 11                     | 3.4     | 53.8         | 15                       | 2.8     | 52.4         | 6                      | 4.5     | 56.1         |
| Beef                                      | 12                     | 3.3     | 57.1         | 11                       | 3.6     | 56.0         | 11                     | 2.9     | 59.0         |
| Biscuits, corn bread, pancakes, tortillas | 13                     | 3.1     | 60.2         | 10                       | 3.6     | 59.6         | 20                     | 2.1     | 61.1         |
| Legumes                                   | 14                     | 3.0     | 63.2         | 13                       | 3.2     | 62.8         | 12                     | 2.8     | 63.9         |
| Cheese                                    | 15                     | 2.9     | 66.1         | 12                       | 3.2     | 66.0         | 18                     | 2.2     | 66.1         |
| Tomatoes, tomato/vegetable juice          | 16                     | 2.9     | 69.0         | 14                       | 2.9     | 68.9         | 13                     | 2.7     | 68.8         |
| Fruit juice                               | 17                     | 2.7     | 71.7         | 16                       | 2.8     | 71.7         | 14                     | 2.7     | 71.5         |
| Fish and shellfish                        | 18                     | 2.3     | 74.0         | 18                       | 2.2     | 73.9         | 15                     | 2.5     | 74.0         |
| Other vegetables                          | 19                     | 2.1     | 76.1         | 20                       | 2.1     | 76.0         | 17                     | 2.2     | 76.2         |

<sup>a</sup> Food groups ( $n = 12$ ) contributing at least 1% in descending order: Candy, sugars and sugary foods; Pasta; Pork, ham, bacon; Milk desserts; Rice, cooked grains; Broccoli, spinach, greens; Hot breakfast cereal; Flour, bran, baking ingredients; Frankfurters, sausages, luncheon meats; Corn, peas, lima beans; Condiments and sauces; and Meal replacements/supplements; <sup>b</sup> Data are Day 1 intakes by adults aged 19+ years ( $n = 9490$ ); <sup>c</sup> Data are Day 1 intakes by adults aged 19–50 years ( $n = 5429$ ); <sup>d</sup> Data are Day 1 intakes by adults aged 51+ years ( $n = 4061$ ).

**Table S16.** Food sources of iron among US adults (from NHANES 2003–2006).

| Food group <sup>a</sup>                   | 19+ years <sup>b</sup> |         |              | 19–50 years <sup>c</sup> |         |              | 51+ years <sup>d</sup> |         |              |
|-------------------------------------------|------------------------|---------|--------------|--------------------------|---------|--------------|------------------------|---------|--------------|
|                                           | Iron                   |         |              | Iron                     |         |              | Iron                   |         |              |
|                                           | (mean = 15.2 mg)       |         |              | (mean = 15.2 mg)         |         |              | (mean = 15.2 mg)       |         |              |
|                                           | Ranking                | % Total | Cumulative % | Ranking                  | % Total | Cumulative % | Ranking                | % Total | Cumulative % |
| Ready-to-eat cereal                       | 1                      | 15.1    | 15.1         | 1                        | 13.0    | 13.0         | 1                      | 18.8    | 18.8         |
| Yeast breads and rolls                    | 2                      | 12.5    | 27.6         | 2                        | 12.0    | 25.0         | 2                      | 13.4    | 32.2         |
| Beef                                      | 3                      | 6.9     | 34.5         | 3                        | 7.3     | 32.3         | 3                      | 6.1     | 38.3         |
| Cakes, cookies, quick bread, pastry, pie  | 4                      | 6.1     | 40.6         | 4                        | 6.1     | 38.4         | 4                      | 6.1     | 44.4         |
| Biscuits, corn bread, pancakes, tortillas | 5                      | 4.7     | 45.3         | 5                        | 5.3     | 43.7         | 5                      | 3.7     | 48.1         |
| Flour, bran, baking ingredients           | 6                      | 4.4     | 49.7         | 6                        | 5.2     | 48.9         | 8                      | 2.9     | 51.0         |
| Poultry                                   | 7                      | 3.3     | 53.0         | 7                        | 3.6     | 52.5         | 9                      | 2.7     | 53.7         |
| Crackers, popcorn, pretzels, chips        | 8                      | 3.2     | 56.2         | 8                        | 3.4     | 55.9         | 7                      | 2.9     | 56.6         |
| Tomatoes, tomato/vegetable juice          | 9                      | 2.9     | 59.1         | 10                       | 3.0     | 58.9         | 12                     | 2.6     | 59.2         |
| Legumes                                   | 10                     | 2.7     | 61.8         | 11                       | 2.8     | 61.7         | 10                     | 2.7     | 61.9         |
| Soft drinks, soda (includes diet)         | 11                     | 2.6     | 64.4         | 9                        | 3.2     | 64.9         | 19                     | 1.7     | 63.6         |
| Pasta                                     | 12                     | 2.3     | 66.7         | 12                       | 2.4     | 67.3         | 13                     | 2.1     | 65.7         |
| Eggs                                      | 13                     | 2.3     | 69.0         | 15                       | 2.1     | 69.4         | 11                     | 2.6     | 68.3         |
| Rice, cooked grains                       | 14                     | 2.1     | 71.1         | 13                       | 2.4     | 71.8         | 20                     | 1.6     | 69.9         |

<sup>a</sup> Food groups ( $n = 13$ ) contributing at least 1% in descending order: Frankfurters, sausages, luncheon meats; Potatoes (white); Hot breakfast cereal; Fruit juice; Fish and shellfish; Nuts, seeds (including butters, pastes); Mixtures, mostly grain; Meal replacements/supplements; Pork, ham, bacon; Fruit; Other vegetables; Soup, broth, bouillon; and Candy, sugars and sugary foods; <sup>b</sup> Data are Day 1 intakes by adults aged 19+ years ( $n = 9490$ ); <sup>c</sup> Data are Day 1 intakes by adults aged 19–50 years ( $n = 5429$ ); <sup>d</sup> Data are Day 1 intakes by adults aged 51+ years ( $n = 4061$ ).

**Table S17.** Food sources of zinc among US adults (from NHANES 2003–2006).

| Food group <sup>a</sup>                 | 19+ years <sup>b</sup> |         |              | 19–50 years <sup>c</sup> |         |              | 51+ years <sup>d</sup> |         |              |
|-----------------------------------------|------------------------|---------|--------------|--------------------------|---------|--------------|------------------------|---------|--------------|
|                                         | Zinc                   |         |              | Zinc                     |         |              | Zinc                   |         |              |
|                                         | (mean = 12.5 mg)       |         |              | (mean = 13.3 mg)         |         |              | (mean = 11.2 mg)       |         |              |
|                                         | Ranking                | % Total | Cumulative % | Ranking                  | % Total | Cumulative % | Ranking                | % Total | Cumulative % |
| Beef                                    | 1                      | 21.1    | 21.1         | 1                        | 22.0    | 22.0         | 1                      | 19.4    | 19.4         |
| Ready-to-eat cereal                     | 2                      | 7.8     | 28.9         | 3                        | 6.7     | 28.7         | 2                      | 9.8     | 29.2         |
| Cheese                                  | 3                      | 7.4     | 36.3         | 2                        | 8.1     | 36.8         | 4                      | 5.9     | 35.1         |
| Poultry                                 | 4                      | 6.2     | 42.5         | 4                        | 6.5     | 43.3         | 5                      | 5.5     | 40.6         |
| Milk                                    | 5                      | 5.9     | 48.4         | 5                        | 5.7     | 49.0         | 3                      | 6.3     | 46.9         |
| Yeast breads and rolls                  | 6                      | 4.2     | 52.6         | 9                        | 3.9     | 52.9         | 6                      | 5.0     | 51.9         |
| Frankfurters, sausages, luncheon meats  | 7                      | 4.0     | 56.6         | 6                        | 4.1     | 57.0         | 9                      | 3.9     | 55.8         |
| Pork, ham, bacon                        | 8                      | 4.0     | 60.6         | 7                        | 3.9     | 60.9         | 7                      | 4.2     | 60.0         |
| Fish and shellfish                      | 9                      | 4.0     | 64.6         | 8                        | 3.9     | 64.8         | 8                      | 4.1     | 64.1         |
| Legumes                                 | 10                     | 2.8     | 67.4         | 11                       | 2.7     | 67.5         | 10                     | 3.0     | 67.1         |
| Crackers, popcorn, pretzels, chips      | 11                     | 2.7     | 70.1         | 10                       | 2.9     | 70.4         | 13                     | 2.3     | 69.4         |
| Cake, cookies, quick bread, pastry, pie | 12                     | 2.5     | 72.6         | 12                       | 2.5     | 72.9         | 12                     | 2.4     | 71.8         |
| Nuts, seeds (including butters, pastes) | 13                     | 2.4     | 75.0         | 13                       | 2.0     | 74.9         | 11                     | 3.0     | 74.8         |

<sup>a</sup> Food groups ( $n = 13$ ) contributing at least 1% in descending order: Eggs; Biscuits, corn bread, pancakes, tortillas; Mixtures, mostly grain; Potatoes (white); Milk desserts; Candy, sugars and sugary foods; Pasta; Coffee, tea, other, nonalcoholic beverages; Tomatoes, tomato/vegetable juice; Rice, cooked grains; Flour, bran, baking ingredients; Meal replacements/supplements; and Other vegetables; <sup>b</sup> Data are Day 1 intakes by adults aged 19+ years ( $n = 9490$ ); <sup>c</sup> Data are Day 1 intakes by adults aged 19–50 years ( $n = 5429$ ); <sup>d</sup> Data are Day 1 intakes by adults aged 51+ years ( $n = 4061$ ).
